# Supplementary material for: Human adenine nucleotide translocases physically and functionally interact with respirasomes
Source: PubMed Central journal article supplement — Mol Biol Cell. 2017 Jun 1;28(11):1489–506. doi: 10.1091/mbc.E17-03-0195 (PMC5449148; doi:10.1091/mbc.e17-03-0195), 2017-06-01
Supplement: supp_E17-03-0195v1_CombinedSupMats.pdf [file supp_E17-03-0195v1_CombinedSupMats.pdf]

# Supplemental Materials

*Molecular Biology of the Cell*

Lu et al.

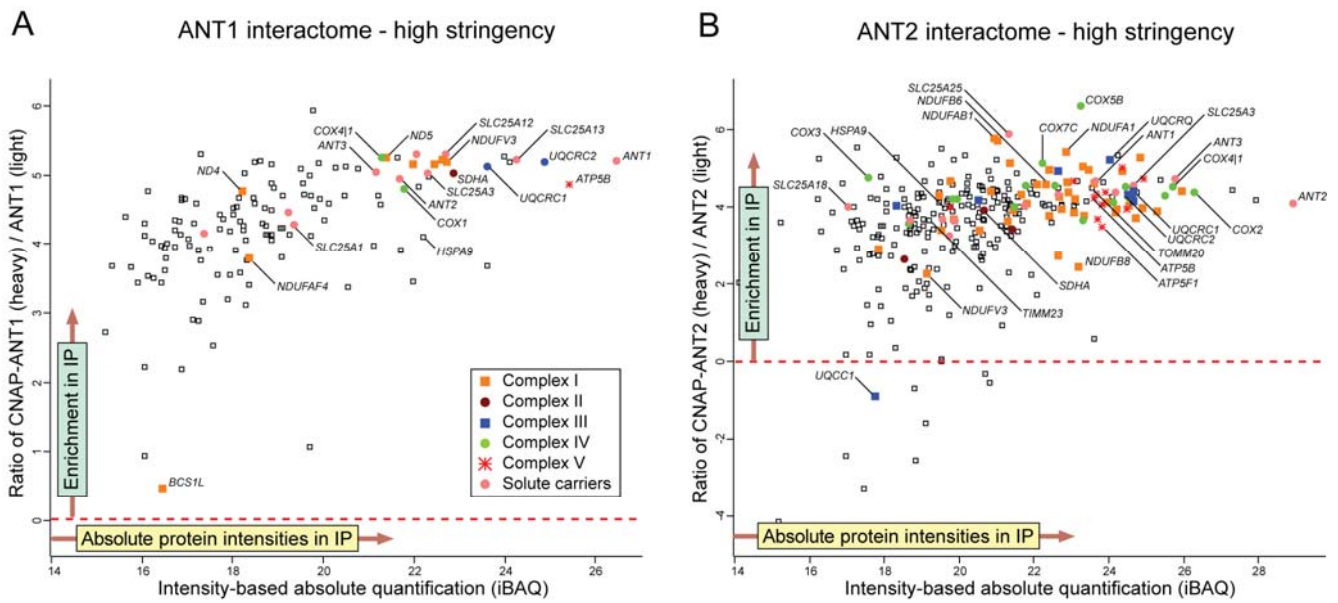

Supplementary Figure 1

**Supplementary Figure 1. Overexpressed ANT1 and ANT2 in HEK293 Flp-In cells interact with numerous heterologous proteins, including respiratory subunits and other solute carriers.** Scatter plot of proteins identified to interact with overexpressed CNAP-ANT1 (A) or CNAP-ANT2 (B) following a high stringency conditions (two consecutive rounds of immunoprecipitation).

**Table S1 – Respiratory proteins identified to interact with ANT1, ANT2, or ANT1 and ANT2.**

|                  | ANT1                                                                                                                                   |                                                                                                                          |                                                                                                                                                  | ANT2                                                                                                                                                                                                                   |                                                                                                                              |                                                                                                                                                                                         | ANT2vsANT1                                                                                                                          |                                                                                                    |                                                                                                  |
|------------------|----------------------------------------------------------------------------------------------------------------------------------------|--------------------------------------------------------------------------------------------------------------------------|--------------------------------------------------------------------------------------------------------------------------------------------------|------------------------------------------------------------------------------------------------------------------------------------------------------------------------------------------------------------------------|------------------------------------------------------------------------------------------------------------------------------|-----------------------------------------------------------------------------------------------------------------------------------------------------------------------------------------|-------------------------------------------------------------------------------------------------------------------------------------|----------------------------------------------------------------------------------------------------|--------------------------------------------------------------------------------------------------|
| Complex I        | ND2<br><i>ND4</i><br><i>ND5</i><br>NDUFA2<br>NDUFA3<br>NDUFA5<br>NDUFA6<br>NDUFA7<br>NDUFA8<br>NDUFA9<br>NDUFA10<br>NDUFA11<br>NDUFA12 | NDUFA13<br>NDUFAB1<br>NDUFB1<br>NDUFB3<br>NDUFB4<br>NDUFB5<br>NDUFB6<br>NDUFB7<br>NDUFB8<br>NDUFB9<br>NDUFB10<br>NDUFB11 | NDUFC2<br><b>NDUFS1</b><br><b>NDUFS2</b><br>NDUFS3<br>NDUFS4<br>NDUFS5<br>NDUFS6<br>NDUFS7<br>NDUFS8<br><b>NDUFV1</b><br>NDUFV2<br><b>NDUFV3</b> | <i>ND1</i><br><b>ND5</b><br><i>NDUFA1</i><br><b>NDUFA2</b><br><b>NDUFA3</b><br><b>NDUFA5</b><br><b>NDUFA6</b><br><b>NDUFA7</b><br><b>NDUFA8</b><br><b>NDUFA9</b><br><b>NDUFA10</b><br><b>NDUFA11</b><br><b>NDUFA12</b> | <b>NDUFA13</b><br><b>NDUFAB1</b><br>NDUFB3<br>NDUFB4<br>NDUFB5<br>NDUFB6<br>NDUFB7<br>NDUFB8<br>NDUFB9<br>NDUFB10<br>NDUFB11 | <b>NDUFS1</b><br><b>NDUFS2</b><br><b>NDUFS3</b><br><b>NDUFS4</b><br><b>NDUFS5</b><br><b>NDUFS6</b><br><b>NDUFS7</b><br><b>NDUFS8</b><br><b>NDUFV1</b><br><b>NDUFV2</b><br><b>NDUFV3</b> | NDUFA1<br>NDUFA2<br>NDUFA3<br>NDUFA5<br>NDUFA6<br>NDUFA7<br>NDUFA8<br>NDUFA9<br>NDUFA10<br>NDUFA11<br>NDUFA12<br>NDUFA13<br>NDUFAB1 | NDUFB1<br>NDUFB3<br>NDUFB4<br>NDUFB5<br>NDUFB6<br>NDUFB7<br>NDUFB8<br>NDUFB9<br>NDUFB10<br>NDUFB11 | NDUFS2<br>NDUFS3<br>NDUFS4<br>NDUFS5<br>NDUFS6<br>NDUFS7<br>NDUFS8<br>NDUFV1<br>NDUFV2<br>NDUFV3 |
| Complex II       | <b>SDHA</b>                                                                                                                            | SDHB                                                                                                                     | SDHC                                                                                                                                             | <b>SDHA</b>                                                                                                                                                                                                            | <b>SDHB</b>                                                                                                                  | <b>SDHC</b>                                                                                                                                                                             | SDHA                                                                                                                                | SDHB                                                                                               | SDHC                                                                                             |
| Complex III      | <b>UQCRC1</b><br><b>UQCRC2</b><br>CYC1                                                                                                 | UQCR10<br>UQCRB                                                                                                          | UQCRFS1<br>UQCRQ                                                                                                                                 | <b>UQCRC1</b><br><b>UQCRC2</b><br>CYC1                                                                                                                                                                                 | <i>CYTB</i><br><b>UQCR10</b><br><b>UQCRB</b>                                                                                 | <b>UQCRFS1</b><br><b>UQCRH</b><br><b>UQCRQ</b>                                                                                                                                          | UQCRC1<br>UQCRC2<br>CYC1                                                                                                            | UQCR10<br>UQCRB                                                                                    | UQCRFS1<br>UQCRH<br>UQCRQ                                                                        |
| Complex IV       | <b>COX1</b><br>COX2<br><b>COX4I</b><br>COX5A                                                                                           | COX5B<br>COX6B1<br>COX6C<br>COX7A2                                                                                       | COX7A2L<br>COX7B<br>COX8A                                                                                                                        | <b>COX2</b><br><b>COX3</b><br><b>COX4I</b><br><b>COX5A</b>                                                                                                                                                             | <b>COX5B</b><br><b>COX6B1</b><br><b>COX6C</b><br><b>COX7A2</b>                                                               | <b>COX7A2L</b><br><b>COX7C</b>                                                                                                                                                          | COX2<br>COX3<br>COX4I<br>COX5A                                                                                                      | COX6A1<br>COX6B1<br>COX6C<br>COX7A2                                                                | COX7A2L<br>COX7C                                                                                 |
| Complex V        | ATP6<br>ATP5A1<br><b>ATP5B</b><br>ATP5C1<br>ATP5D                                                                                      | ATP5E<br>ATP5F1<br>ATP5H<br>ATP5I<br>ATP5J2                                                                              | ATP5L<br>ATP5O<br>ATP5S<br>ATPIF1                                                                                                                | ATP6<br><b>ATP5A1</b><br><b>ATP5B</b><br><b>ATP5C1</b><br><b>ATP5D</b>                                                                                                                                                 | <b>ATP5F1</b><br><b>ATP5H</b><br><b>ATP5I</b><br>ATP5J<br><b>ATP5J2</b>                                                      | <b>ATP5L</b><br><b>ATP5O</b><br><b>ATP5S</b><br>ATP5SL                                                                                                                                  | ATP6<br>ATP8<br>ATP5A1<br>ATP5B<br>ATP5C1                                                                                           | ATP5D<br>ATP5E<br>ATP5F1<br>ATP5H<br>ATP5I                                                         | ATP5J<br>ATP5L<br>ATP5O<br>ATP5S<br>ATP5SL                                                       |
| Assembly factors | NDUFAF1<br>NDUFAF2<br>NDUFAF3<br><b>NDUFAF4</b><br>TIMMDC1                                                                             | UQCC1<br>UQCC2<br>COA1<br>COA3                                                                                           | COX20<br>SCO1<br>SCO2<br><i>BCS1L</i>                                                                                                            | <b>NDUFAF1</b><br><b>NDUFAF2</b><br><b>NDUFAF3</b><br><b>NDUFAF4</b><br><b>TIMMDC1</b>                                                                                                                                 | UQCC1<br>UQCC2<br>COA1<br>COA3                                                                                               | <b>COX11</b><br><i>COX20</i><br><b>SCO1</b><br><b>SCO2</b>                                                                                                                              | NDUFAF1<br>NDUFAF2<br>NDUFAF3<br>NDUFAF4<br>TIMMDC1                                                                                 | UQCC1<br>UQCC2<br>COA1<br>COA3<br>COA7                                                             | COX11<br>COX20<br>SCO1<br>SCO2                                                                   |

\*For column 1 (ANT1) and column 2 (ANT2), proteins identified in low stringency IPs are indicated in regular font while those identified only in the high stringency IPs are in italics. Bolded proteins are identified in both low and high stringency iterations.

\*\*Coverage: For complex I subunits: ANT1 low, 35/44; ANT1 high, 6/44; ANT2 low, 33/44; ANT2 high, 36/44; Both, 35/44. For complex II subunits: ANT1 low, 3/4; ANT1 high, 1/4; ANT2 low, 3/4; ANT2 high, 3/4; Both, 3/4. For complex III subunits: ANT1 low, 7/10; ANT1 high, 2/10; ANT2 low, 8/10; ANT2 high, 9/10; Both, 8/10. For complex IV subunits: ANT1 low, 11/19; ANT1 high, 2/19; ANT2 low, 10/19; ANT2 high, 10/19; Both, 11/19. For complex V subunits: ANT1 low, 14/19; ANT1 high, 1/19; ANT2 low, 14/19; ANT2 high, 11/19; Both, 15/19. For associated assembly factors: ANT1 low, 15/40; ANT1 high, 5/40; ANT2 low, 15/40; ANT2 high, 13/40; Both, 16/40. Gene families from HUGO Gene Nomenclature Committee were used to determine coverage.

\*\*\*Only hits that have a heavy/light ratio of >0 are shown here.

**Table S2 – Mitochondrial carriers identified to interact with ANT1, ANT2, or ANT1 and ANT2.**

| ANT1            | ANT2            | ANT2vsANT1 |
|-----------------|-----------------|------------|
| <b>SLC25A1</b>  | <b>SLC25A1</b>  | SLC25A1    |
| <b>SLC25A3</b>  | <b>SLC25A3</b>  | SLC25A3    |
| SLC25A10        | <b>SLC25A10</b> | SLC25A10   |
| SLC25A11        | <b>SLC25A11</b> | SLC25A11   |
| <b>SLC25A12</b> | SLC25A12        | SLC25A12   |
| <b>SLC25A13</b> | <b>SLC25A13</b> | SLC25A13   |
| SLC25A18        | SLC25A14        | SLC25A15   |
| SLC25A19        | SLC25A15        | SLC25A19   |
| SLC25A20        | <i>SLC25A18</i> | SLC25A20   |
| SLC25A21        | <b>SLC25A19</b> | SLC25A21   |
| <i>SLC25A23</i> | <b>SLC25A20</b> | SLC25A22   |
| <b>SLC25A24</b> | <b>SLC25A21</b> | SLC25A24   |
| <b>SLC25A25</b> | SLC25A22        | SLC25A25   |
|                 | <b>SLC25A24</b> | SLC25A44   |
|                 | <b>SLC25A25</b> |            |
|                 | SLC25A32        |            |
|                 | SLC25A33        |            |

\*For column 1 (ANT1) and column 2 (ANT2), proteins identified in low stringency IPs are indicated in regular font while those identified only in the high stringency IPs are in italics. Bolded proteins are identified in both low and high stringency iterations. Note that SLC25A4, SLC25A5, and SLC25A6, corresponding to ANT1, ANT2, and ANT3 respectively, are identified in all experimental runs but not noted here in the table.

\*\*Only hits that have a heavy/light ratio of >0 are shown here.

**Table S3 – Mitochondrial proteins identified via mass spectrometry to interact with ANT1, ANT2, or ANT1 and ANT2.** All the hits identified in each of the five experimental iterations are noted in separate sheets in one Excel file: ANT1 low, ANT1 high, ANT2 low, ANT2 high, and ANT2vsANT1. In the final iteration, eluates from CNAP-ANT1 (unlabeled) and CNAP-ANT2 (labeled) high stringency IPs were used as input material.
